# Supplementary material for: Autotaxin impedes anti-tumor immunity by suppressing chemotaxis and tumor infiltration of CD8+ T cells
Source: PubMed Central journal article supplement — Cell Rep. Author manuscript; Available in PMC 2022 Jan 16. (PMC8761359; doi:10.1016/j.celrep.2021.110013), 2021-11-16
Supplement: NIHMS1757905-supplement-1.pdf [file NIHMS1757905-supplement-1.pdf]

**Supplemental information**

**Autotaxin impedes anti-tumor immunity  
by suppressing chemotaxis  
and tumor infiltration of CD8<sup>+</sup> T cells**

**Elisa Matas-Rico, Elselien Frijlink, Irene van der Haar Àvila, Apostolos Menegakis, Maaïke van Zon, Andrew J. Morris, Jan Koster, Fernando Salgado-Polo, Sander de Kivit, Telma Lança, Antonio Mazzocca, Zoë Johnson, John Haanen, Ton N. Schumacher, Anastassis Perrakis, Inge Verbrugge, Joost H. van den Berg, Jannie Borst, and Wouter H. Moolenaar**

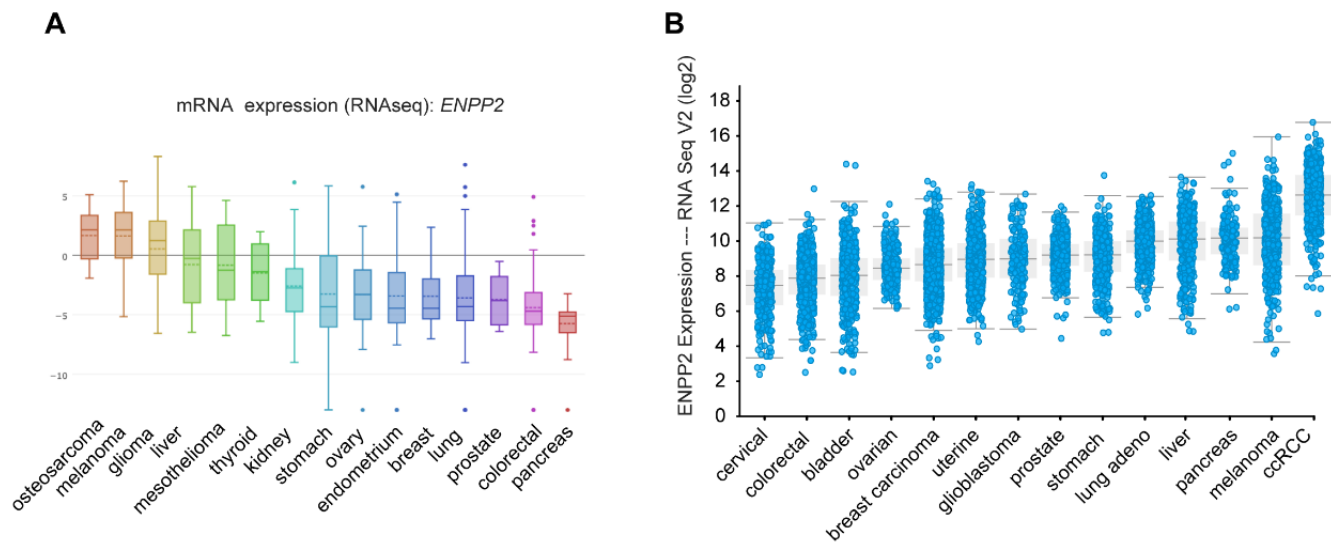

**Figure S1. ATX mRNA expression in cancer cell lines and solid tumors. Related to Figures 2 and 7.**

**(A)** *ENPP2* expression in the indicated cell lines ranked according to median values. Note high *ENPP2* expression in melanoma cell lines (n=61). RNAseq expression data were retrieved from the Cancer Cell Line Encyclopedia (CCLE; <https://portals.broadinstitute.org/ccle>).

**(B)** Pan-cancer analysis of *ENPP2* expression in the indicated solid tumors ranked according to median values (ccRCC, clear cell renal cell carcinoma). RNAseq v2 mRNA expression data were retrieved from the TCGA database ([www.cbioportal.org](http://www.cbioportal.org)). Note that *ENPP2* expression in cancer cell lines poorly correlates with that in the corresponding tumors, which is attributed to the presence of ATX-expressing stromal cells.

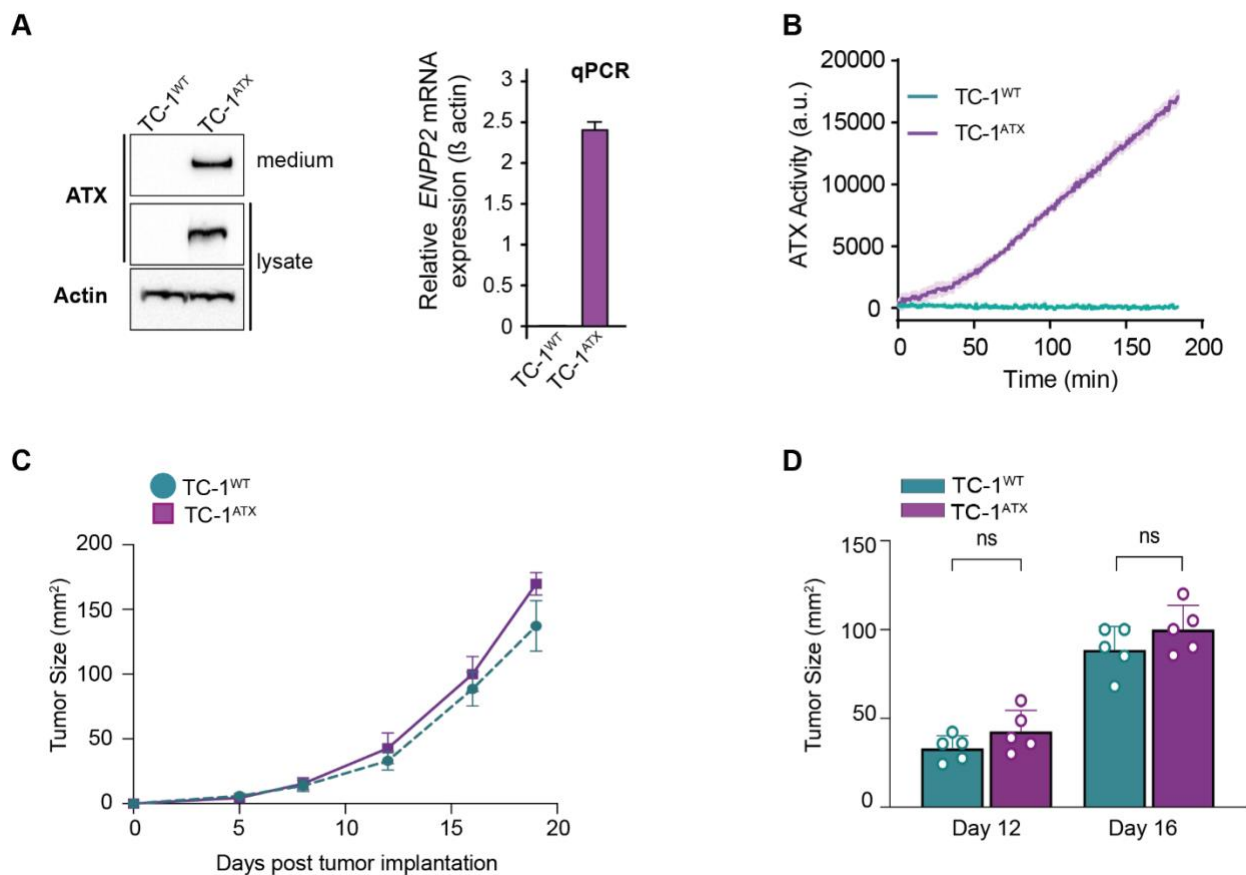

**Figure S2. Characteristics of wild-type and ATX-expressing TC-1 tumors. Related to Figures 5 and 6.**

**(A)** (Left) immunoblot analysis of ATX protein expression in wild-type (TC-1<sup>WT</sup>) and ATX-expressing (TC-1<sup>ATX</sup>) tumor cells. Actin was used as loading control. (Right) ATX mRNA expression (relative to Cyclophilin) in TC-1<sup>WT</sup> and TC-1<sup>ATX</sup> cells as analyzed by qPCR.

**(B)** Secreted ATX (lysoPLD) activity in supernatants from TC-1<sup>WT</sup> and TC-1<sup>ATX</sup> cells, as measured by choline release from added LPC(18:1) over time. See Methods for details.

**(C)** TC-1<sup>WT</sup> and TC-1<sup>ATX</sup> tumor growth expressed as mean size in non-vaccinated mice (n=5).

**(D)** Average tumor size in the same mice as in (C) on days 12 and 16 after s.c. tumor cell implantation. Data is depicted as mean ± SD; ns: not significant (Mann-Whitney U test).

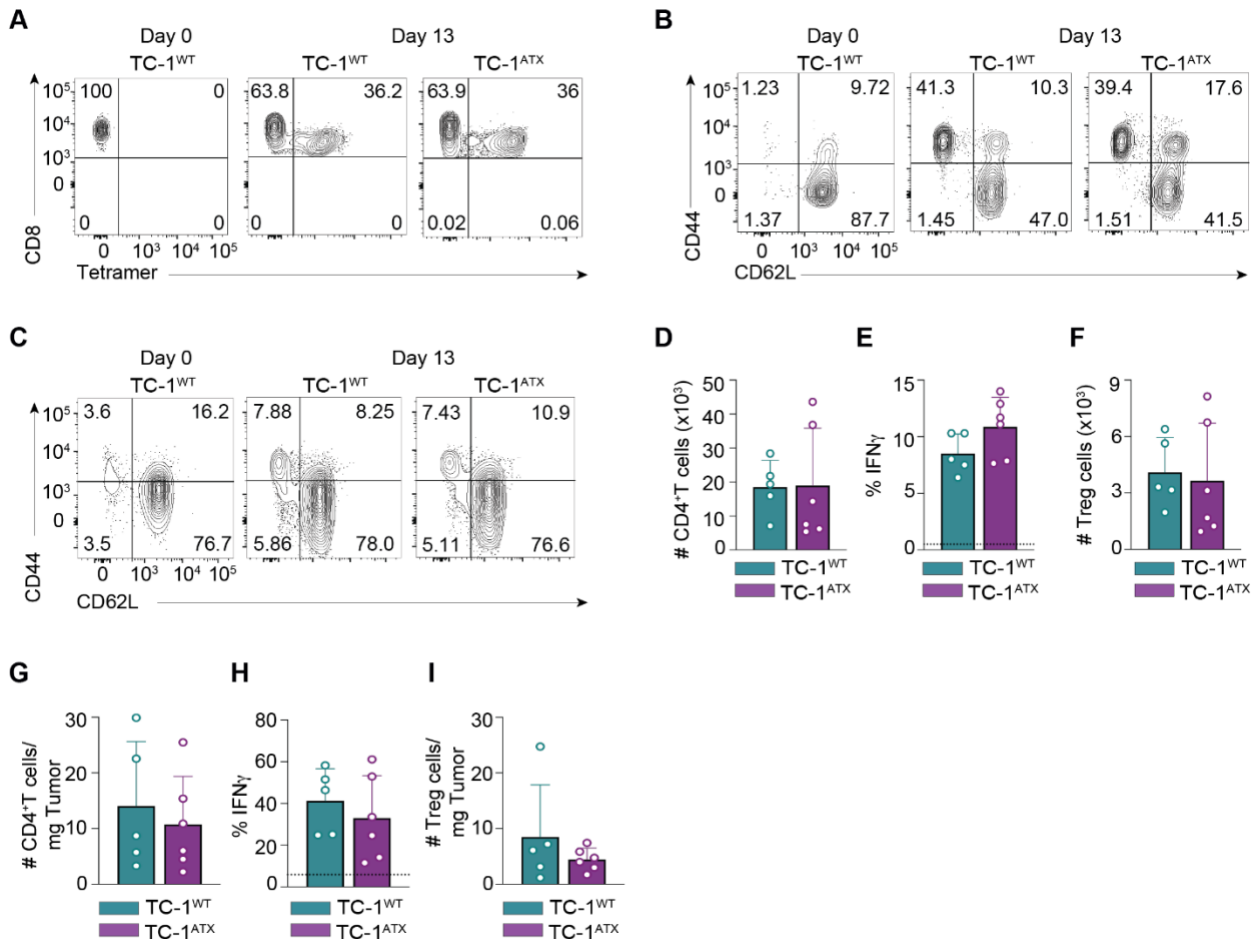

**Figure S3. Enforced ATX expression in tumor cells does not affect the CD4<sup>+</sup> T-cell response to vaccination. Related to Figures 5 and 6.**

**(A-C)** Primary data belonging to **Figure 5**. Representative flow cytometry plots depicting H-2D<sup>b</sup>/E7<sub>49-57</sub> Tet<sup>+</sup> cells **(A)** and CD44<sup>+</sup>CD62L<sup>-</sup> effector phenotype cells among total CD8<sup>+</sup> T cells **(B)** and total CD4<sup>+</sup> T cells **(C)** in blood from TC-1<sup>WT</sup> (n = 6) and TC-1<sup>ATX</sup> (n = 5) tumor-bearing mice at day 13 post vaccination. Data at day 0 are from non-vaccinated TC-1<sup>WT</sup> tumor-bearing mice.

**(D-I)** CD4<sup>+</sup> T cell populations as analyzed by flow cytometry in spleen **(D-F)** and tumors **(G-I)** of TC-1<sup>WT</sup> (n = 5) and TC-1<sup>ATX</sup> (n = 6) tumor-bearing mice at day 18 after tumor implantation.

**(D)** Absolute number (#) of FOXP3<sup>-</sup> CD4<sup>+</sup> conventional T cells (Tconv) in spleen.

**(E)** Frequency of IFN $\gamma$ <sup>+</sup> cells among conventional CD4<sup>+</sup> T cells in spleen. IFN $\gamma$  was measured as outlined in **Figure 5**.

**(F)** Absolute number (#) of FOXP3<sup>+</sup> CD4<sup>+</sup> T cells (Tregs) in spleen.

**(G)** Absolute number (#) of CD4<sup>+</sup> Tconv cells per mg tumor tissue, found in TC-1<sup>WT</sup> and TC-1<sup>ATX</sup> tumor-bearing mice.

**(H)** Frequency of IFN $\gamma$ <sup>+</sup> cells within CD4<sup>+</sup> Tconv cells in the tumors. IFN $\gamma$  was measured as outlined in **Figure 5**.

**(I)** Absolute number (#) of CD4<sup>+</sup> Tregs in TC-1<sup>WT</sup> and TC-1<sup>ATX</sup> tumors.

**(D-I)** Data are depicted as mean  $\pm$  SD; no significance for all cell populations analyzed (Mann-Whitney U test). Data are from one experiment representative of two experiments.

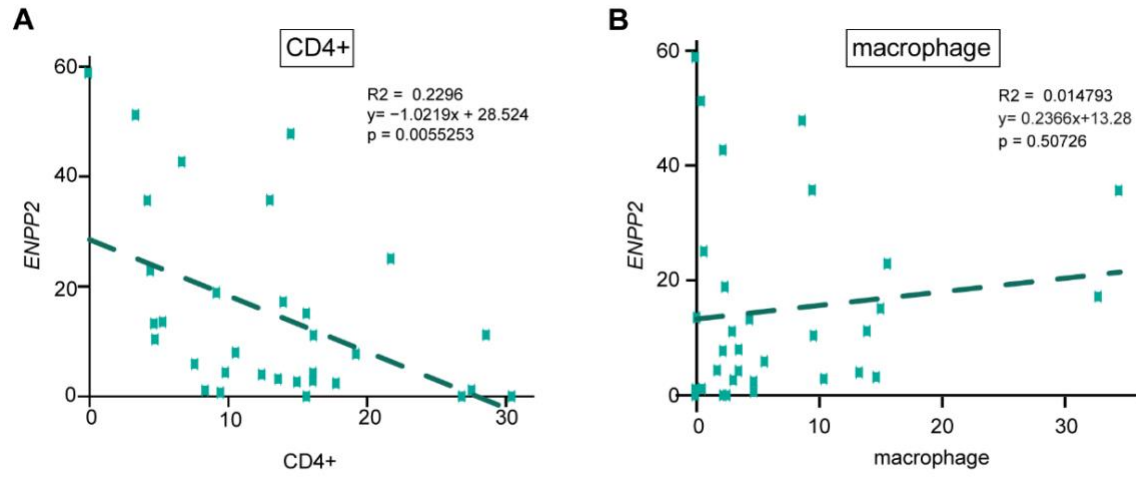

**Figure S4. *ENPP2* expression and accumulation of CD4<sup>+</sup> T cells (A) and macrophages (B) in melanoma tumors (n=32). Related to Figure 7.**

Pearson's correlation between the percentage of inferred *ENPP2*-expressing cells and CD4<sup>+</sup> T cells versus macrophages as indicated. For details see text and **Figure 7**.
